# Supplementary material for: Current Condition of Pannonic Salt Steppes at Their Distribution Limit: What Do Indicator Species Reveal about Habitat Quality?
Source: MDPI journal article supplement (doi:10.3390/plants10030530), 2021-03-11
Supplement: s1 [file s1]

Supplementary material for research article

**Current condition of Pannonic salt steppes at their  
distribution limit:  
what do indicator species reveal about habitat quality?**

Zuzana Dítě, Róbert Šuvada, Tibor Tóth, Pavol Eliáš,  
Vladimír Píš & Daniel Dítě

Submitted to PLANTS journal

**S2\_Photos of vegetation plots with three flagship species of salt steppes  
taken by the authors during field sampling**



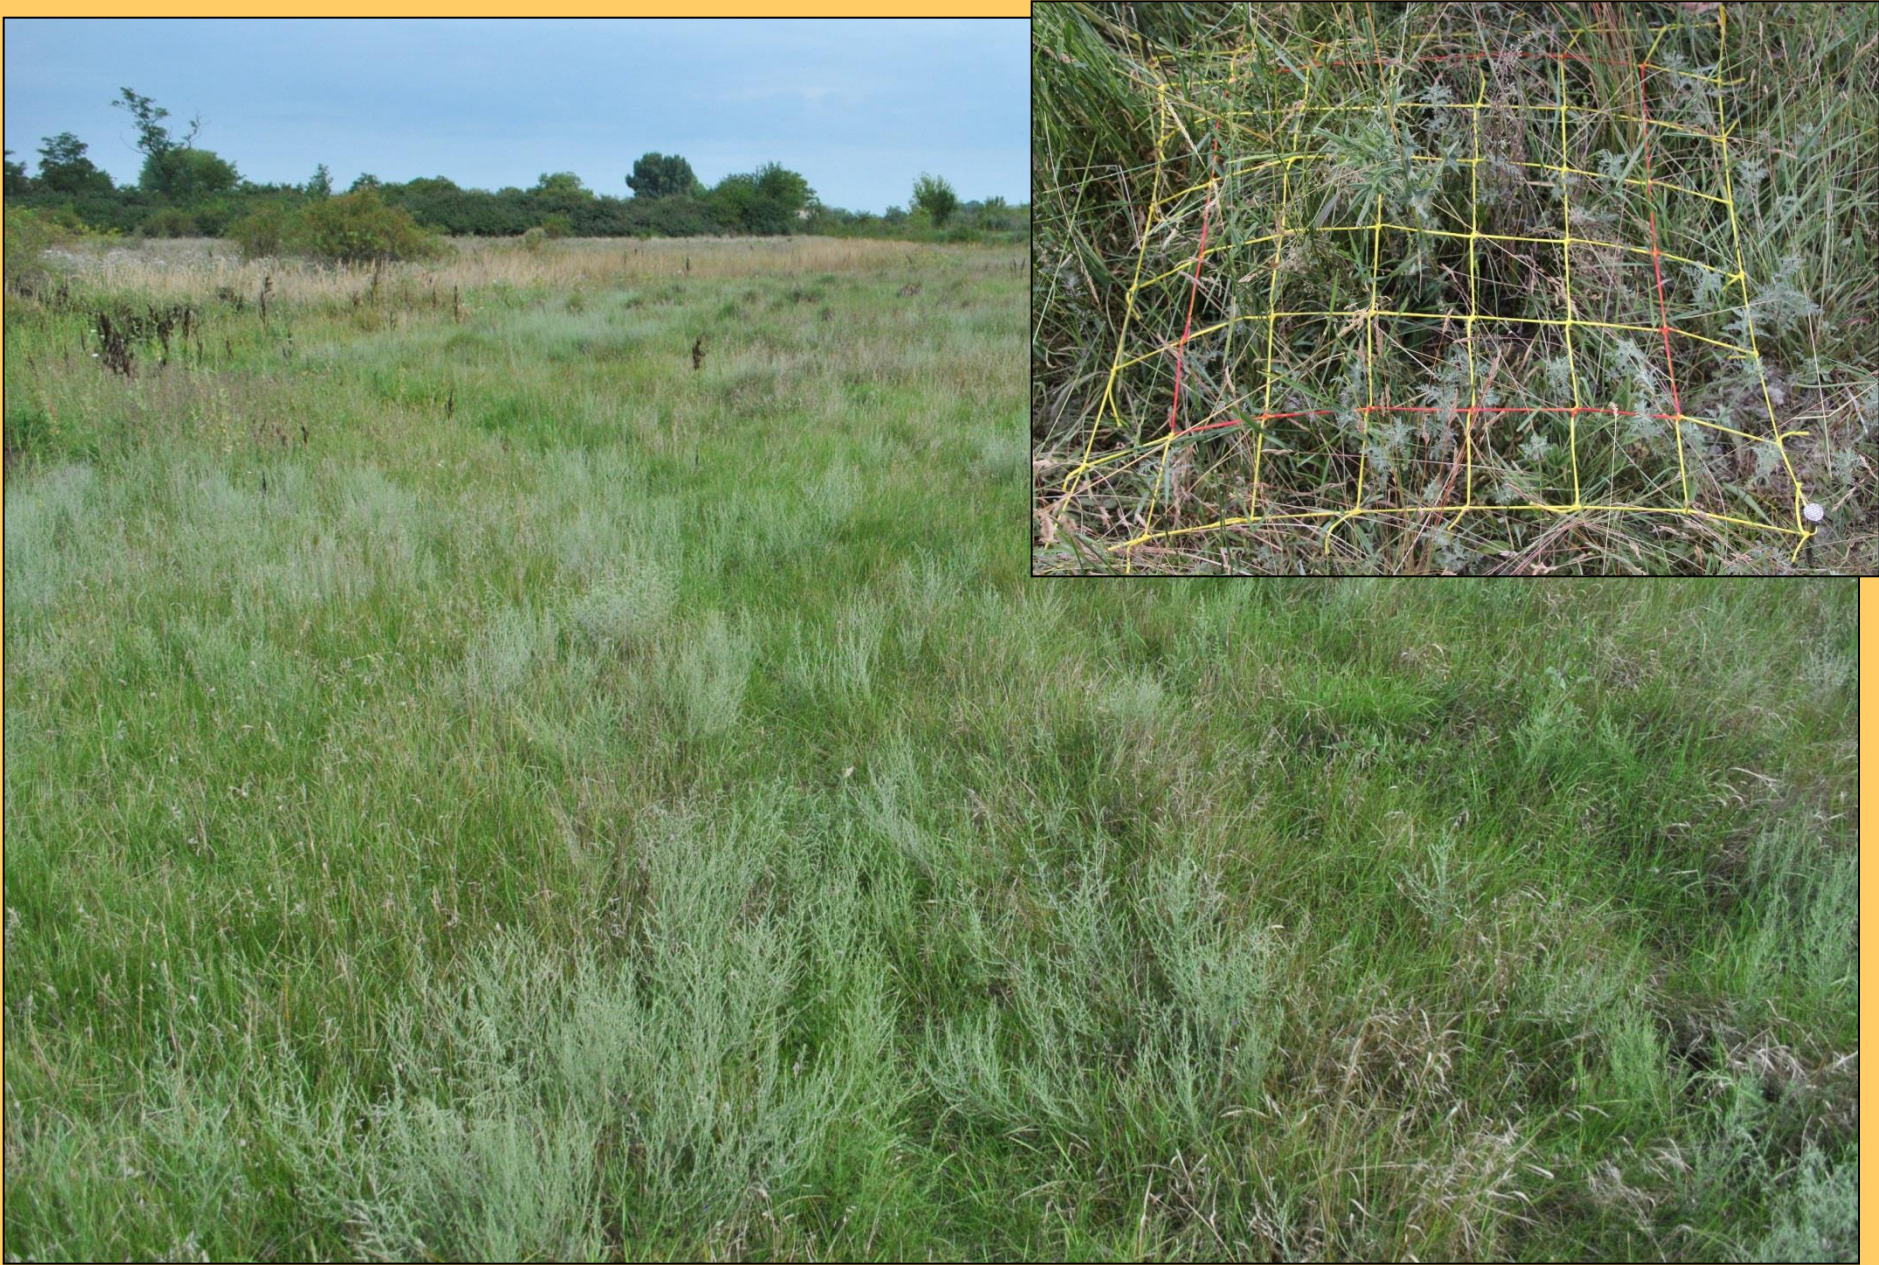

Degraded *Artemisia* steppe, vegetation plot with indicator species *Artemisia santonicum* subsp. *patens*, recorded in Slovakia, site no. 7 in Supplementary material S3, group of naturalness 4.



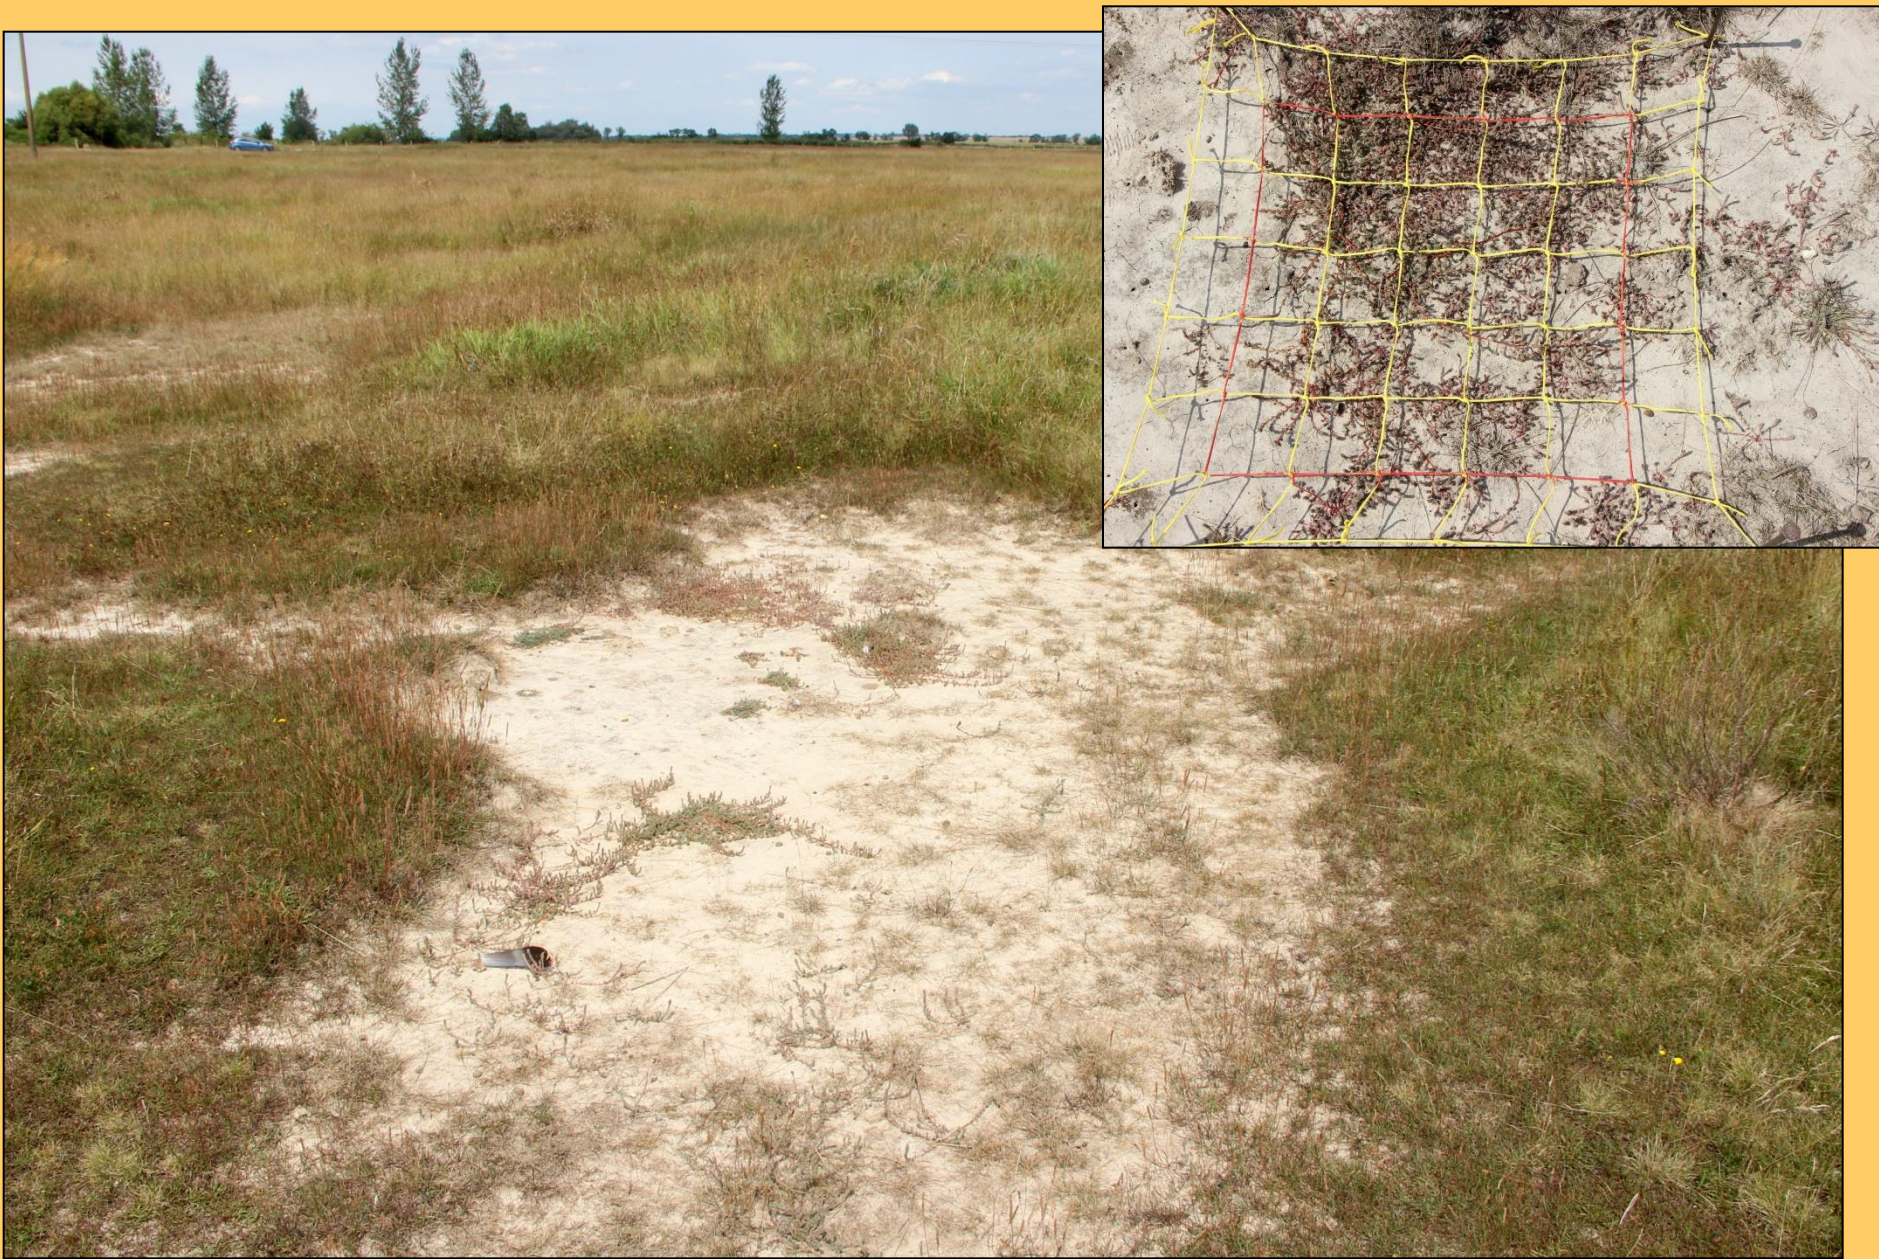

Barren spots of alkali soils occuppied by therophyte stands of *Camphorosma annua*, plot recorded in Slovakia, site no. 10 in Supplementary material S3, group of naturalness: 1.



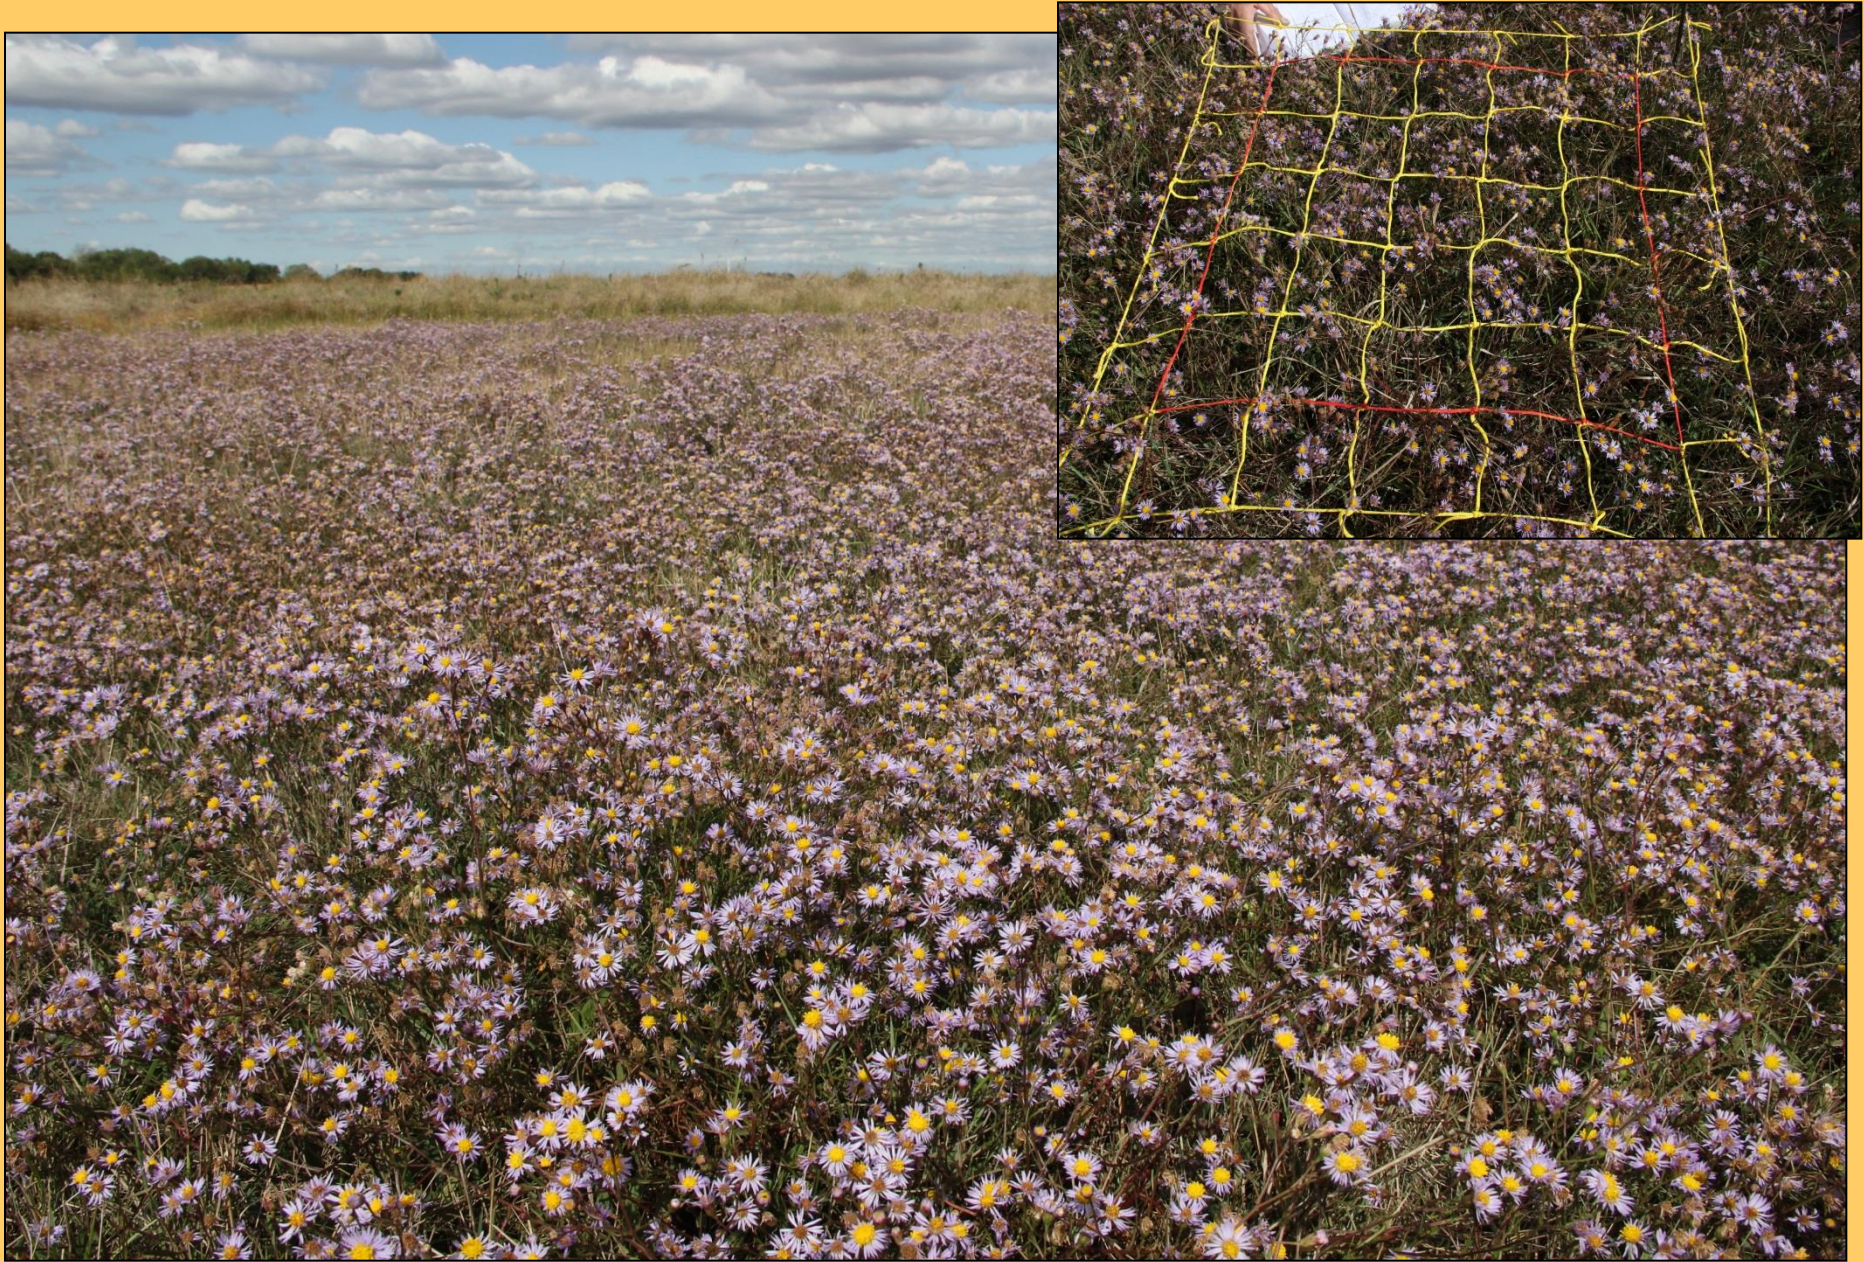

Flat depressions on saline soils with degraded stands of *Tripolium pannonicum* subsp. *pannonicum*, plot recorded in Slovakia, site no. 23 in Supplementary material S3, group of naturalness 3.



# Reference vegetation of preserved Pannonic salt steppes with characteristic zonation in Hungary

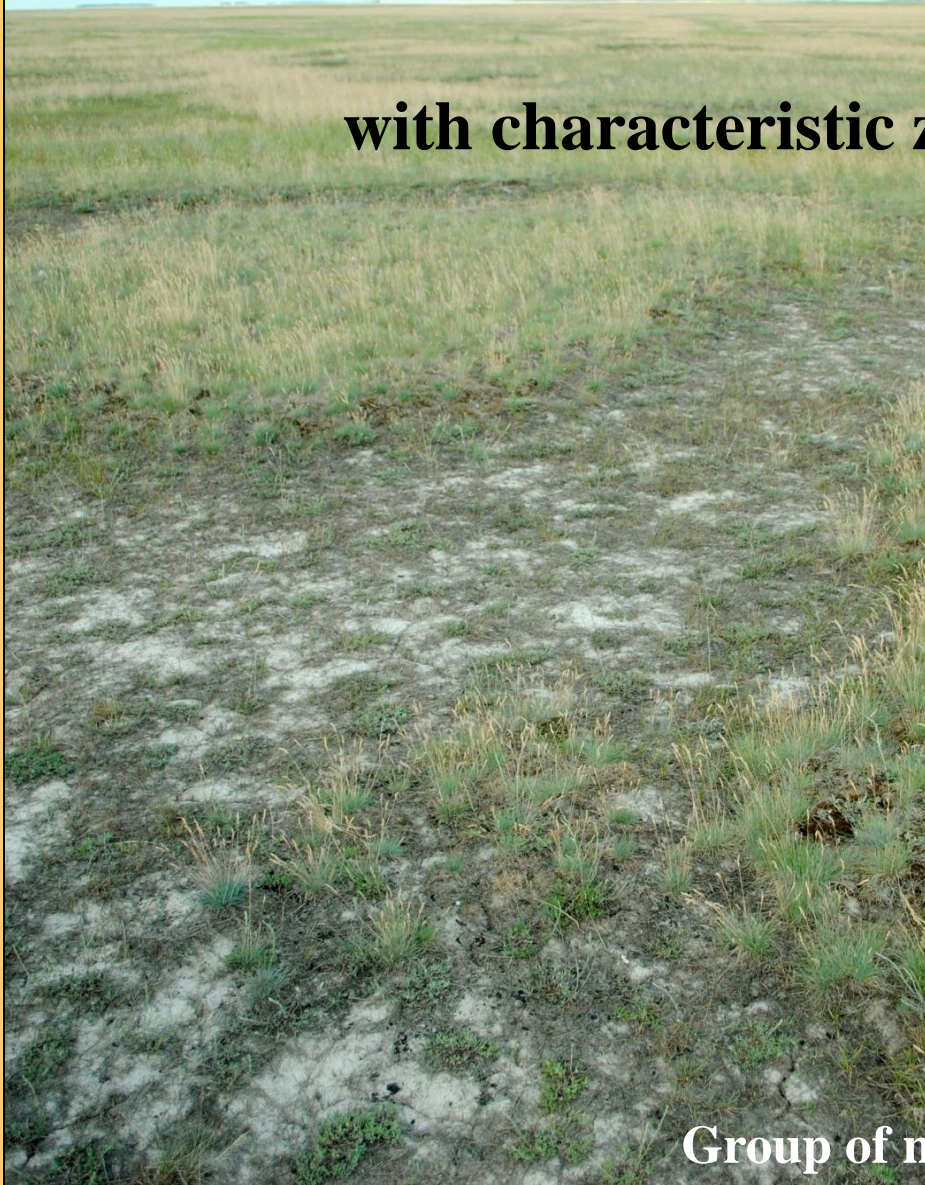

Group of naturalness 1

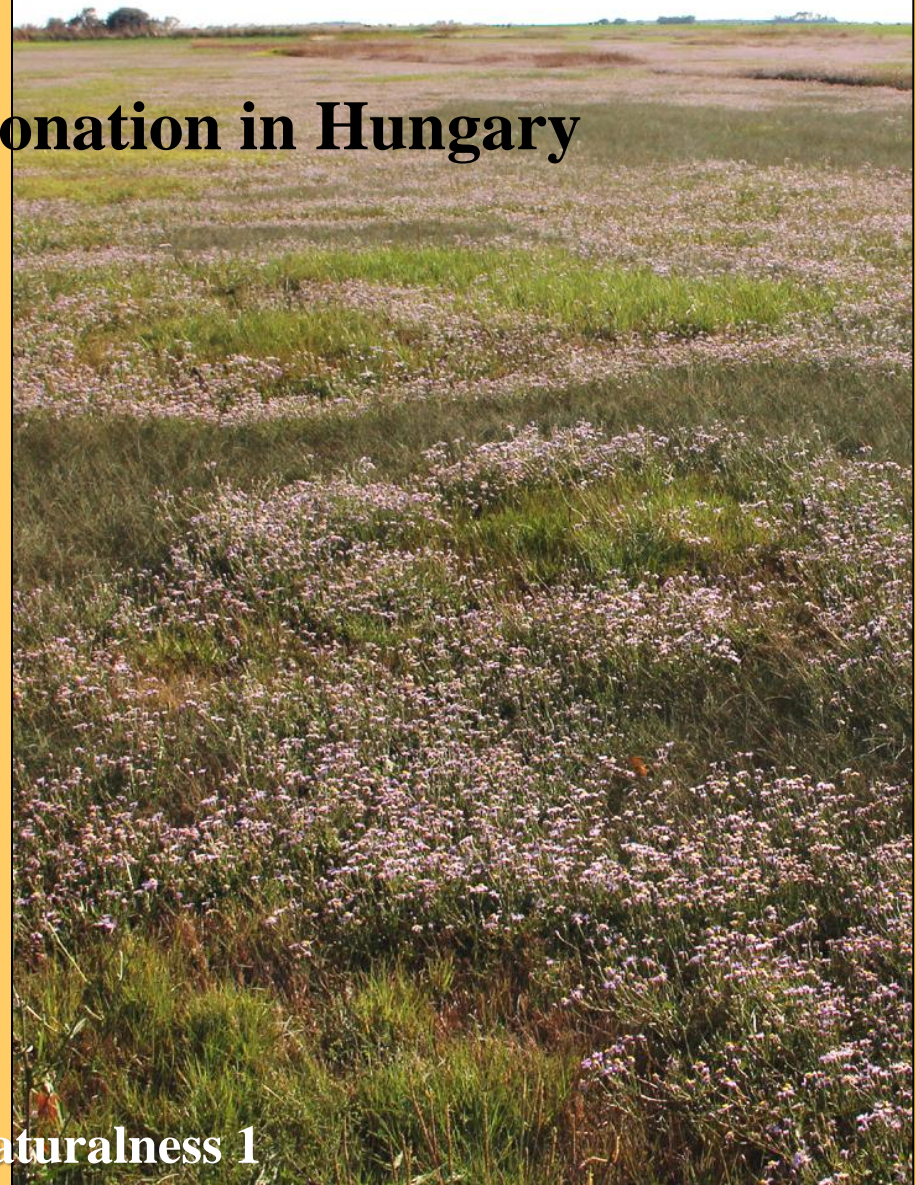

Mosaic of alkali habitats: *Artemisia* steppes and barren spots with *Camphorosma annua* in Hortobágy. Flat saline depressions with stands of *Tripolium pannonicum* subsp. *pannonicum* in Kiskunság.
